# Supplementary material for: Two New Bidesmoside Triterpenoid Saponins from the Seeds of Momordica charantia L
Source: MDPI journal article supplement (doi:10.3390/molecules19022238), 2014-02-21
Supplement: s1 [file s1]

# Supplementary Materials

Figure S1. The TOCSY Spectrum of Compound C1.

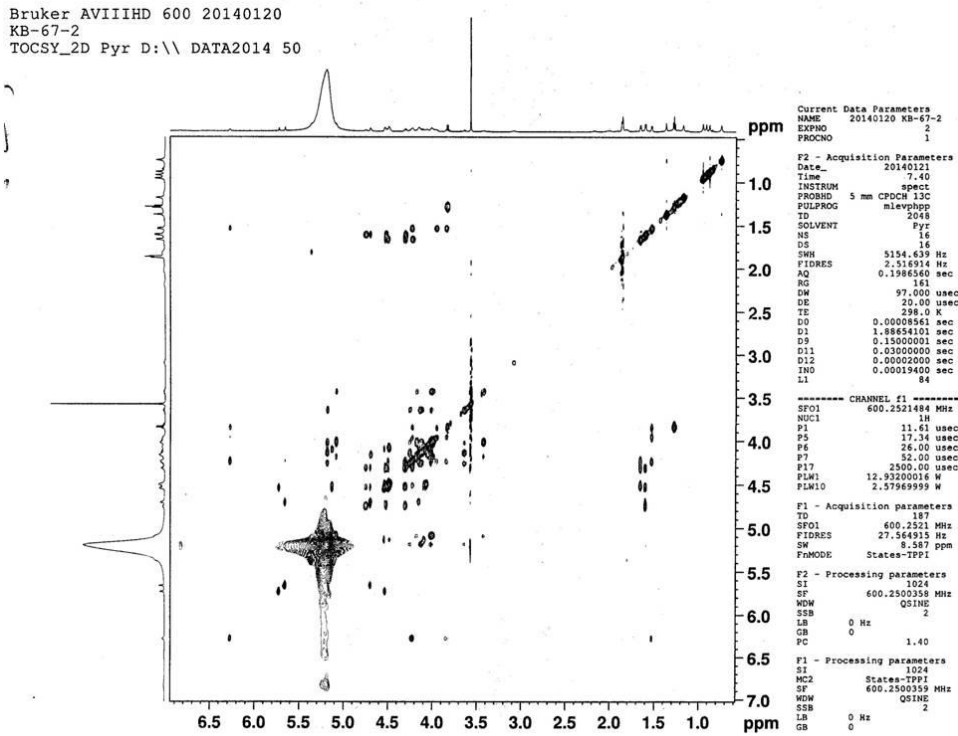

The whole TOCSY Spectrum of Compound C1.

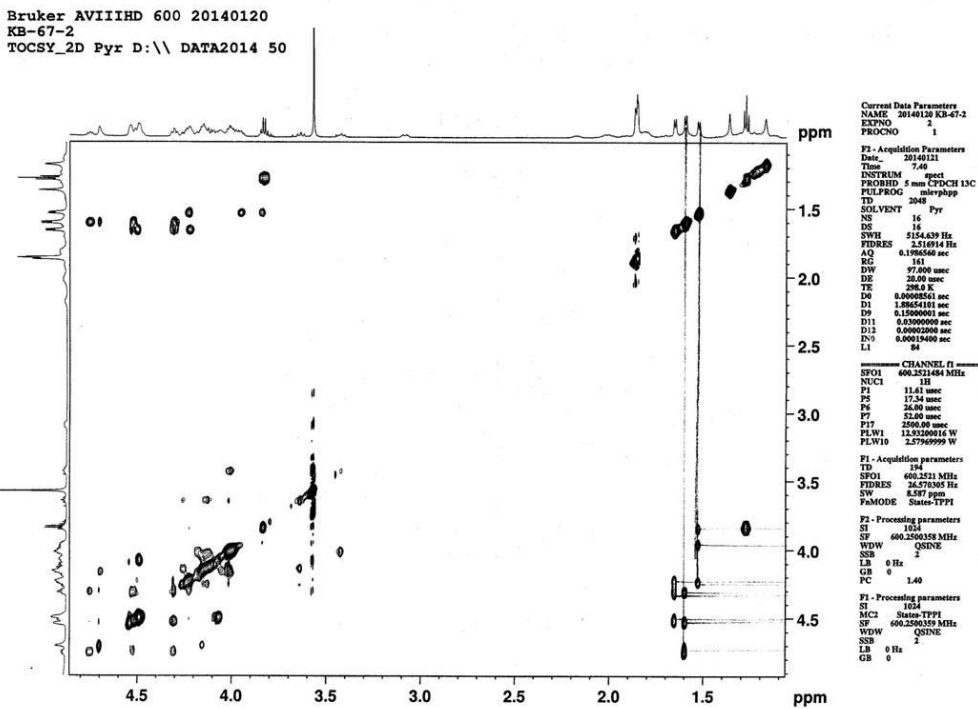

The part 1 of the TOCSY Spectrum of Compound C1.

Figure S1. Cont.

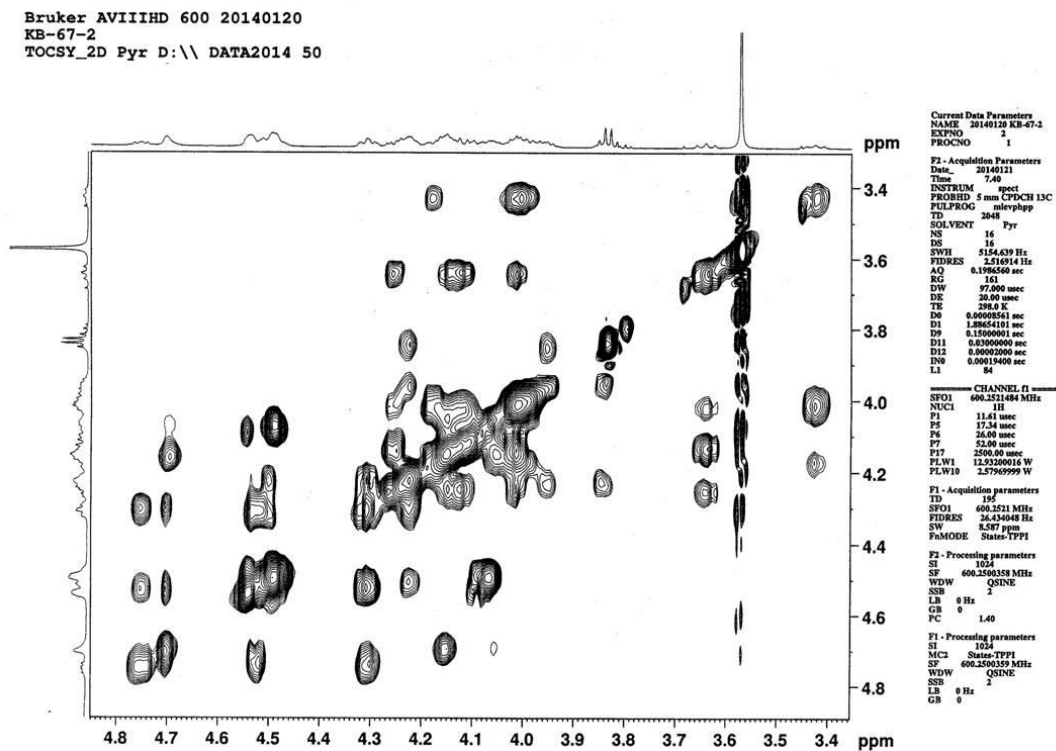

The part 2 of the TOCSY Spectrum of Compound C1.

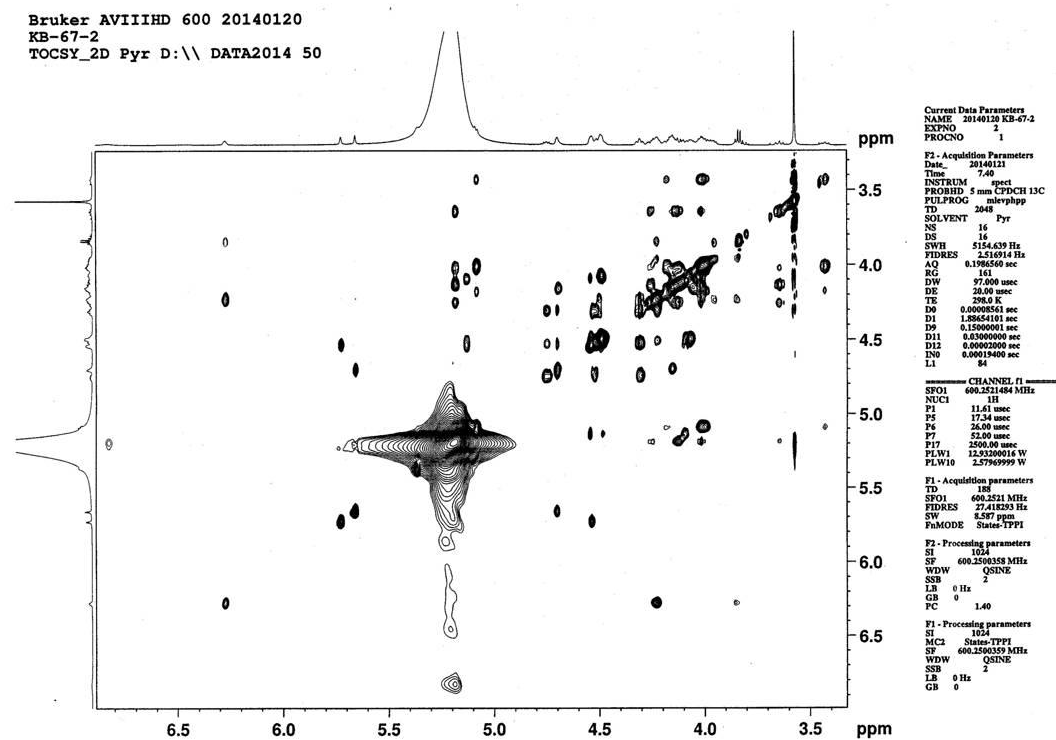

The part 3 of the TOCSY Spectrum of Compound C1.

Figure S1. Cont.

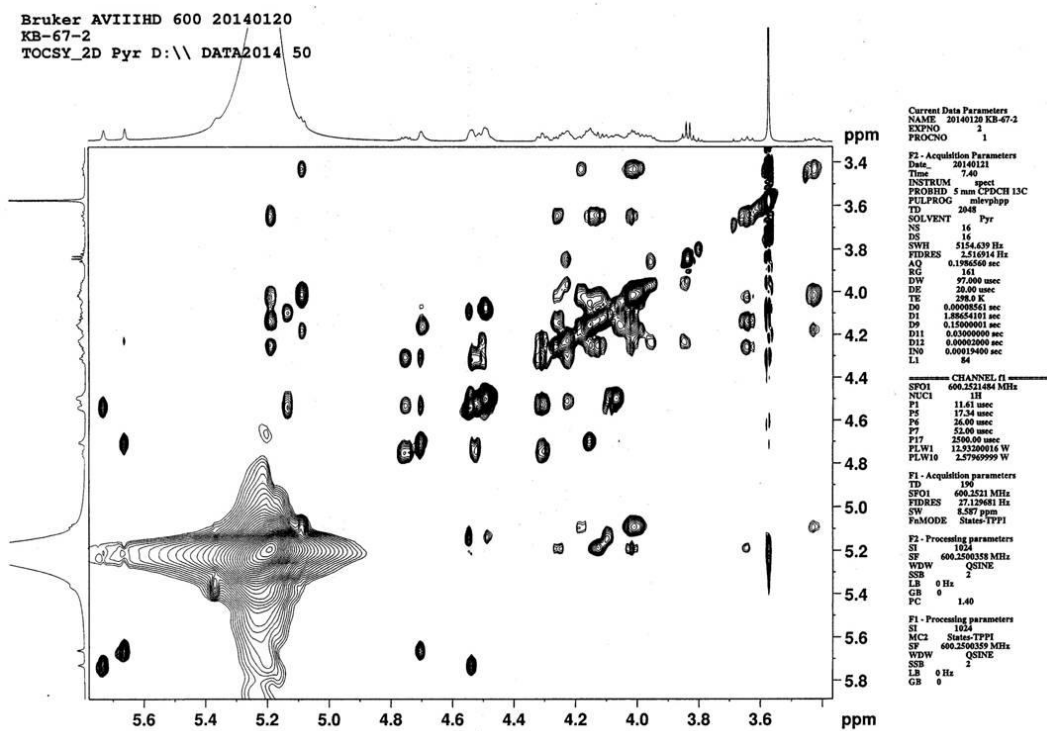

The part 4 of the TOCSY Spectrum of Compound C1.

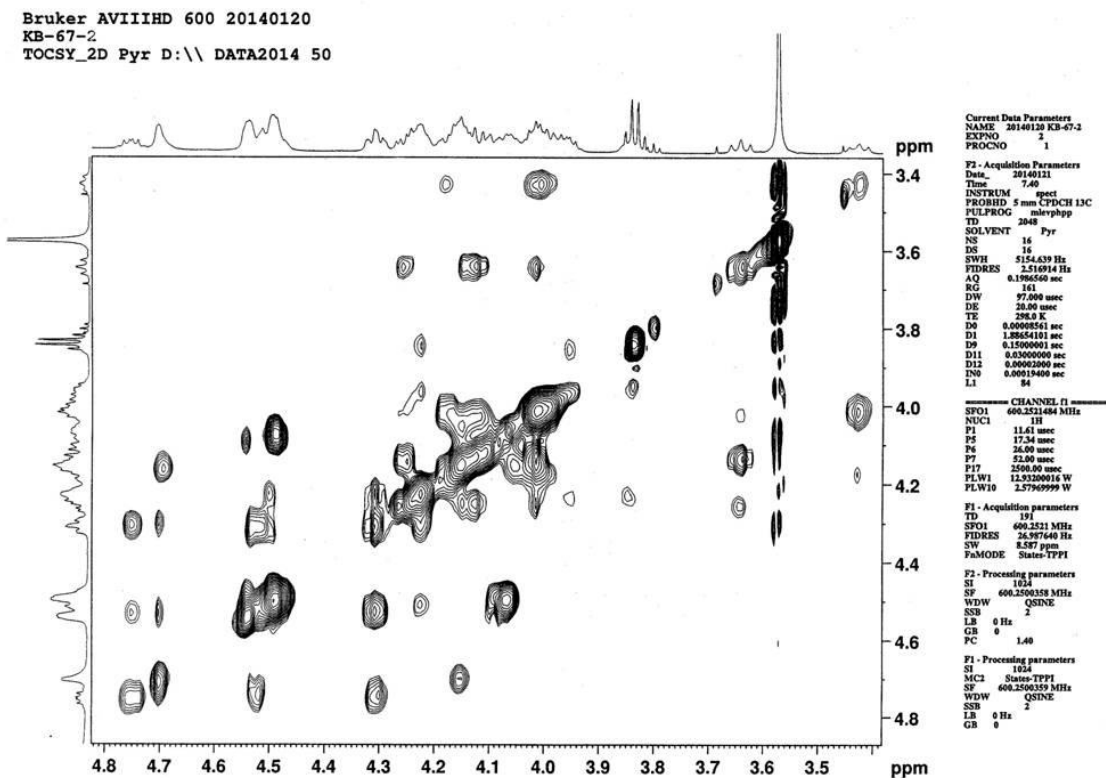

The part 5 of the TOCSY Spectrum of Compound C1.

Figure S2. The TOCSY Spectrum of Compound C2.

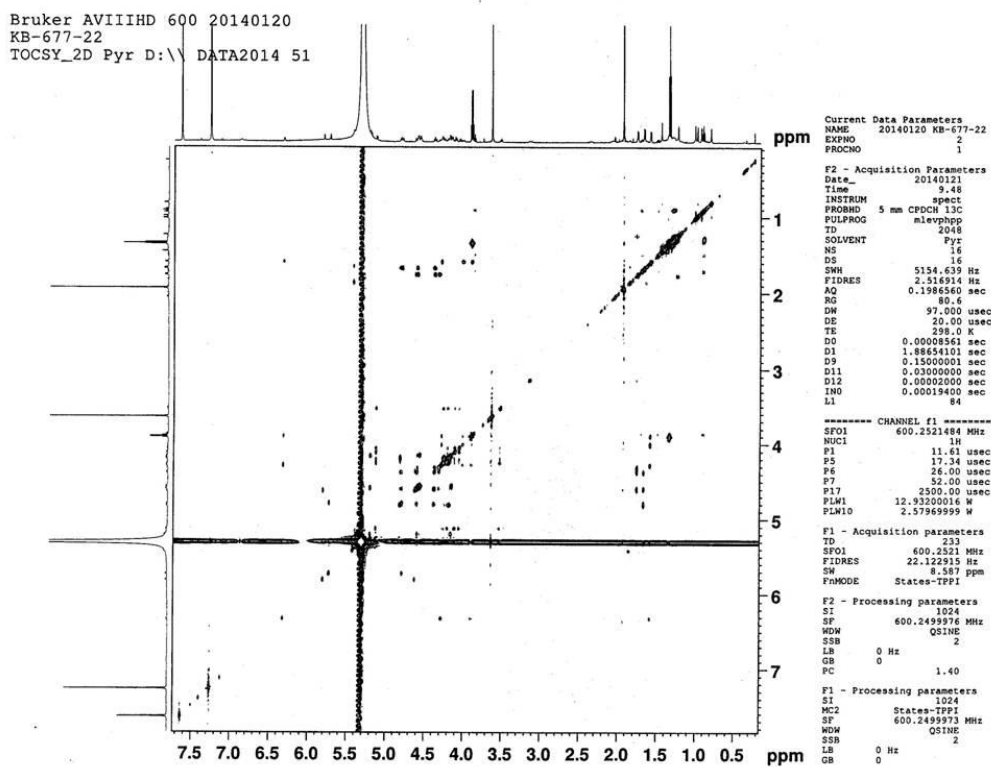

The whole TOCSY Spectrum of Compound C2.

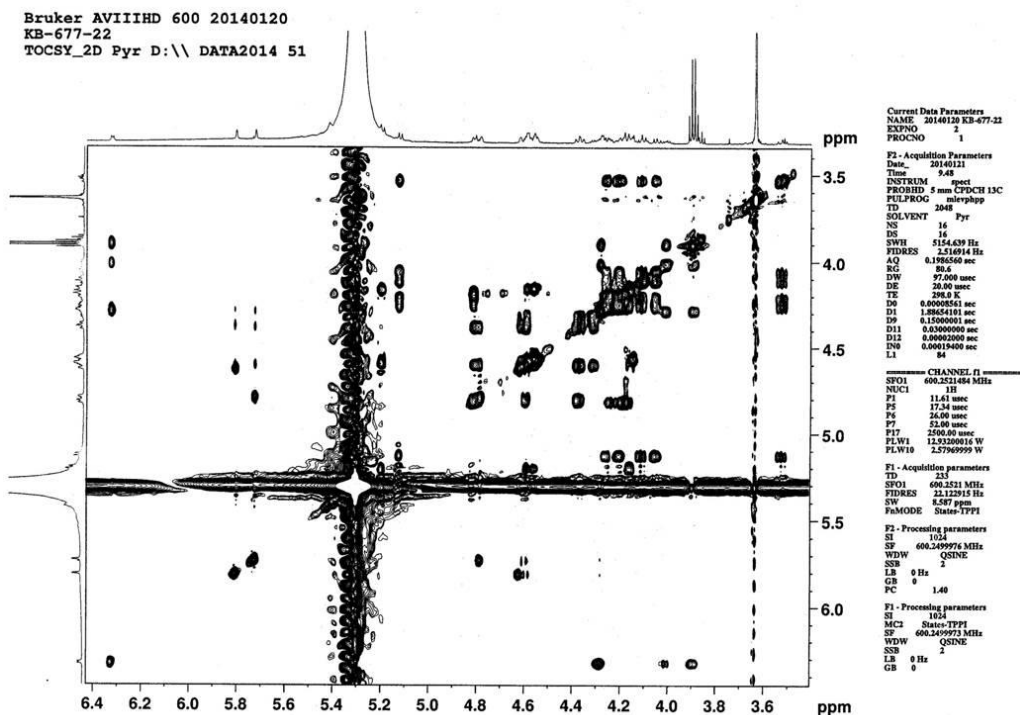

The part 1 of the TOCSY Spectrum of Compound C2.

Figure S2. Cont.

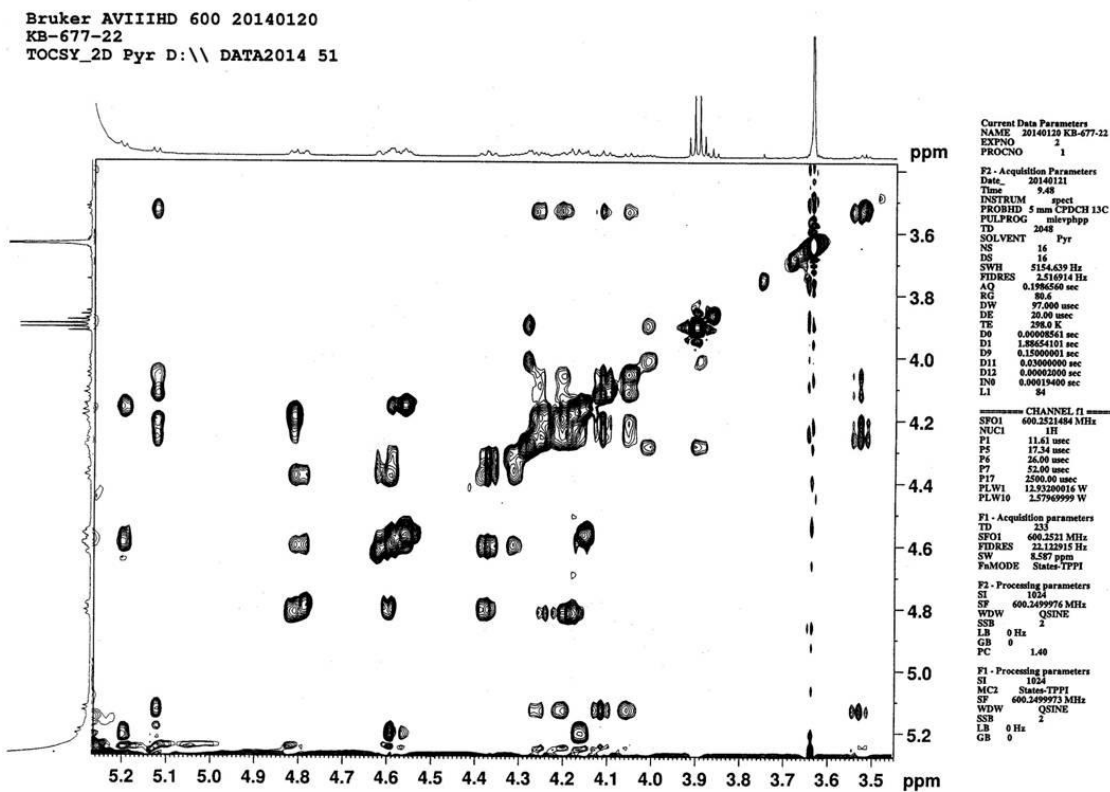

The part 2 of the TOCSY Spectrum of Compound C2.

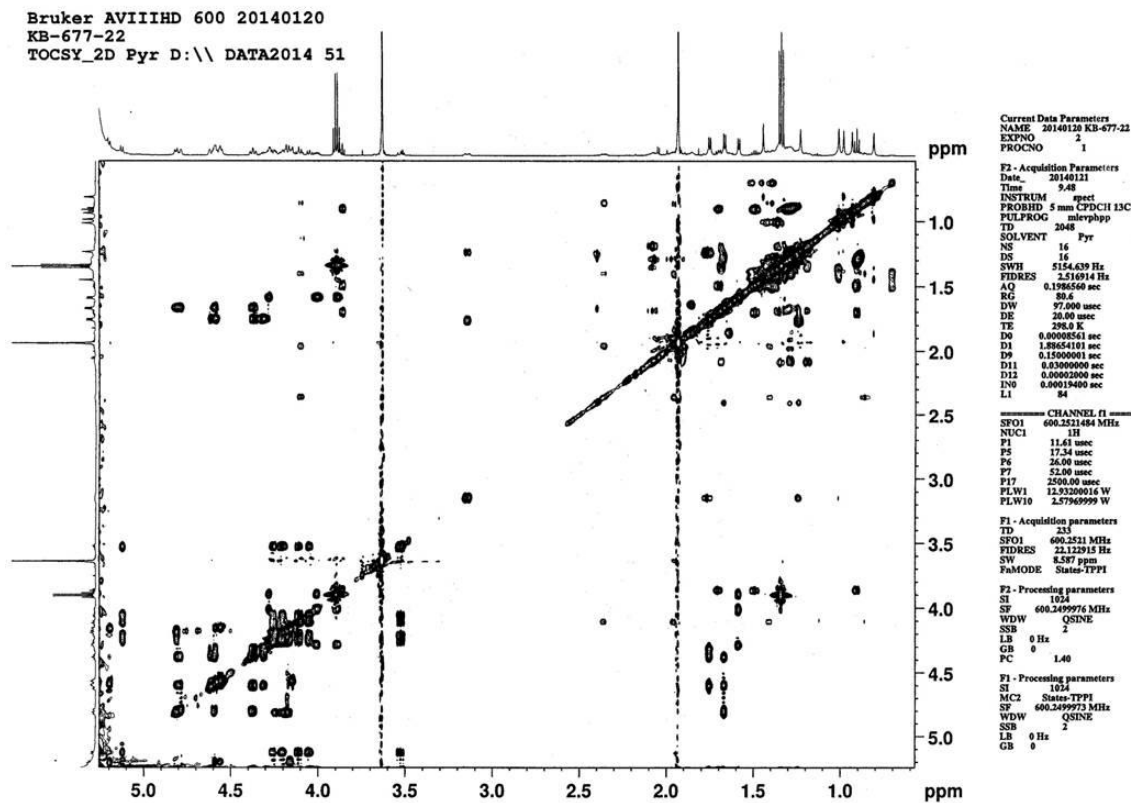

The part 3 of the TOCSY Spectrum of Compound C2.

Figure S2. Cont.

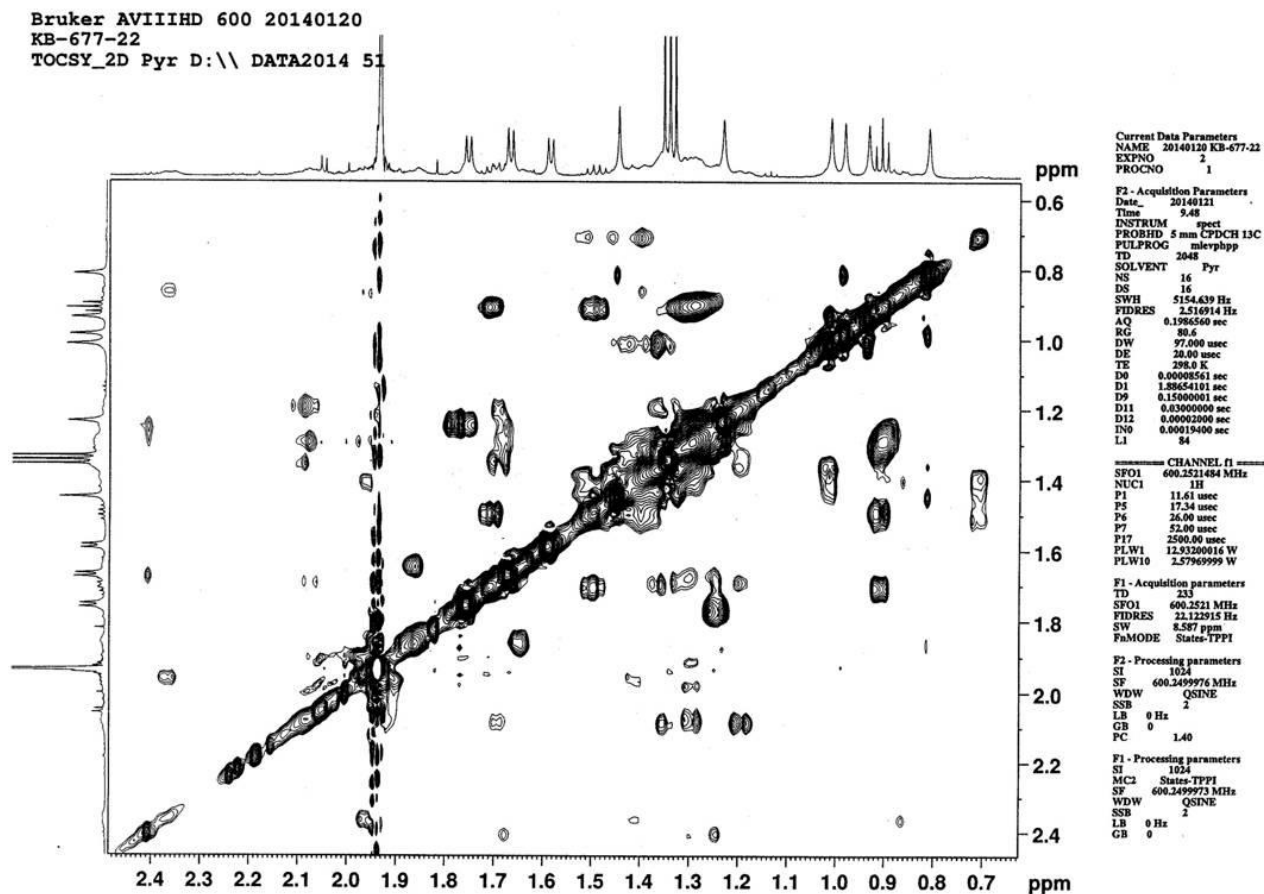

The part 4 of the TOCSY Spectrum of Compound C2.

**Figure S3.** The HPLC Chromatography of the derivatives of sugars in Compound C1.

```

Data file : D:\DATA\JTF\A 2013-06-05 10-43-11\041-0101.D
Sample Name: 2-1
=====
Injection Date : Wed, 5. Jun. 2013          Seq Line : 1
Sample Name    : 2-1                        Location  : Vial 41
Acq Operator   : SLL                        Inj. No. : 1
                                           Inj. Vol.: 20 µl

Acq. Method    : D:\DATA\JTF\A 2013-06-05 10-43-11\JTF.M
Analysis Method: C:\CHEM32\1\METHODS\DEF_LC.M
Last Changed   : Wed, 26. Jun. 2013, 10:02:45 am
                  (modified after loading)
    
```

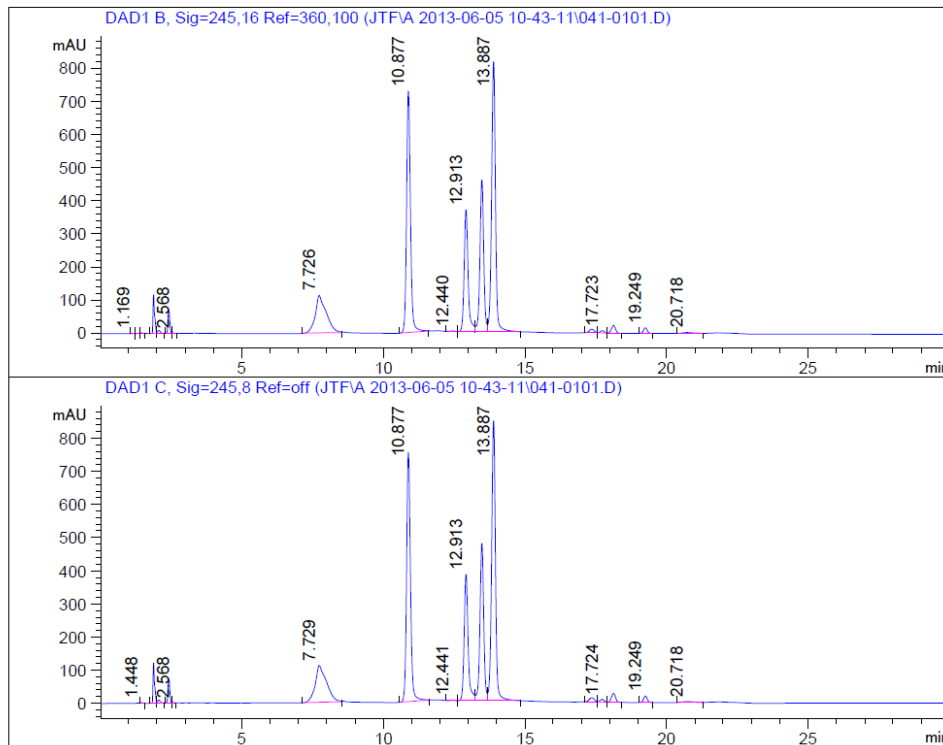

=====  
 Customized Report: Area Percent Report  
 =====

```

Multiplier      : 1.000000
Dilution        : 1.000000
Uncalibrated Peaks : not reported
    
```

Signal 1: DAD1 B, Sig=245,16 Ref=360,100

| Peak # | RT [min] | Type | Width [min] | Height [mAU] | Area % | Area [mAU*s] |
|--------|----------|------|-------------|--------------|--------|--------------|
| 1      | 1.169    | BV   | 0.087       | 1.003        | 0.021  | 5.732        |
| 2      | 1.323    | VV   | 0.123       | 1.387        | 0.037  | 10.096       |
| 3      | 1.446    | VB   | 0.060       | 3.271        | 0.050  | 13.484       |
| 4      | 1.878    | BV   | 0.058       | 118.094      | 1.716  | 466.661      |
| 5      | 2.060    | VB   | 0.102       | 9.423        | 0.231  | 62.857       |

Figure S3. Cont.

Data file : D:\DATA\JTF\A 2013-06-05 10-43-11\041-0101.D

Sample Name: 2-1

2

| Peak # | RT [min] | Type | Width [min] | Height [mAU] | Area % | Area [mAU*s] |
|--------|----------|------|-------------|--------------|--------|--------------|
| 6      | 2.418    | BV   | 0.071       | 69.837       | 1.169  | 317.954      |
| 7      | 2.568    | VV   | 0.068       | 1.576        | 0.027  | 7.345        |
| 8      | 7.726    | BB   | 0.355       | 113.697      | 11.299 | 3073.369     |
| 9      | 10.877   | BB   | 0.145       | 729.668      | 25.593 | 6961.459     |
| 10     | 12.440   | BV   | 0.181       | 2.074        | 0.082  | 22.252       |
| 11     | 12.913   | VV   | 0.148       | 368.248      | 13.189 | 3587.517     |
| 12     | 13.473   | VV   | 0.142       | 458.987      | 15.631 | 4251.577     |
| 13     | 13.887   | VB   | 0.145       | 816.262      | 28.463 | 7742.103     |
| 14     | 17.354   | BV   | 0.202       | 11.466       | 0.549  | 149.386      |
| 15     | 17.723   | VV   | 0.152       | 7.526        | 0.270  | 73.446       |
| 16     | 18.122   | VB   | 0.157       | 23.426       | 0.865  | 235.264      |
| 17     | 19.249   | BB   | 0.145       | 16.865       | 0.582  | 158.271      |
| 18     | 20.718   | BB   | 0.339       | 2.641        | 0.226  | 61.422       |

Signal 2: DAD1 C, Sig=245,8 Ref=off

| Peak # | RT [min] | Type | Width [min] | Height [mAU] | Area % | Area [mAU*s] |
|--------|----------|------|-------------|--------------|--------|--------------|
| 1      | 1.448    | VB   | 0.063       | 2.545        | 0.038  | 10.583       |
| 2      | 1.878    | BV   | 0.058       | 122.080      | 1.715  | 482.782      |
| 3      | 2.060    | VB   | 0.102       | 9.639        | 0.229  | 64.497       |
| 4      | 2.418    | BV   | 0.071       | 72.319       | 1.171  | 329.658      |
| 5      | 2.568    | VV   | 0.069       | 1.667        | 0.028  | 7.841        |
| 6      | 7.729    | BB   | 0.364       | 111.709      | 11.031 | 3104.410     |
| 7      | 10.877   | BB   | 0.145       | 753.384      | 25.550 | 7190.292     |
| 8      | 12.441   | BV   | 0.181       | 2.149        | 0.082  | 22.952       |
| 9      | 12.913   | VV   | 0.148       | 381.733      | 13.215 | 3719.042     |
| 10     | 13.473   | VV   | 0.142       | 476.033      | 15.669 | 4409.695     |
| 11     | 13.887   | VB   | 0.145       | 846.198      | 28.518 | 8025.639     |
| 12     | 17.354   | BV   | 0.202       | 13.212       | 0.613  | 172.390      |
| 13     | 17.724   | VV   | 0.152       | 8.679        | 0.302  | 85.074       |
| 14     | 18.122   | VB   | 0.157       | 26.960       | 0.964  | 271.164      |
| 15     | 19.249   | BB   | 0.145       | 19.364       | 0.646  | 181.728      |
| 16     | 20.718   | BB   | 0.342       | 2.770        | 0.229  | 64.583       |



**Figure S4.** The HPLC Chromatography of the derivatives of sugars in Compound C2.

```

Data file : D:\DATA\JTF\A 2013-06-05 10-43-11\042-0201.D
Sample Name: 2-2
=====
Injection Date : Wed, 5. Jun. 2013          Seq Line :      2
Sample Name    : 2-2                        Location  :    Vial 42
Acq Operator   : SLL                         Inj. No. :      1
                                           Inj. Vol.:    20 µl

Acq. Method    : D:\DATA\JTF\A 2013-06-05 10-43-11\JTF.M
Analysis Method: C:\CHEM32\1\METHODS\DEF_LC.M
Last Changed   : Wed, 26. Jun. 2013, 10:02:45 am
                (modified after loading)
    
```

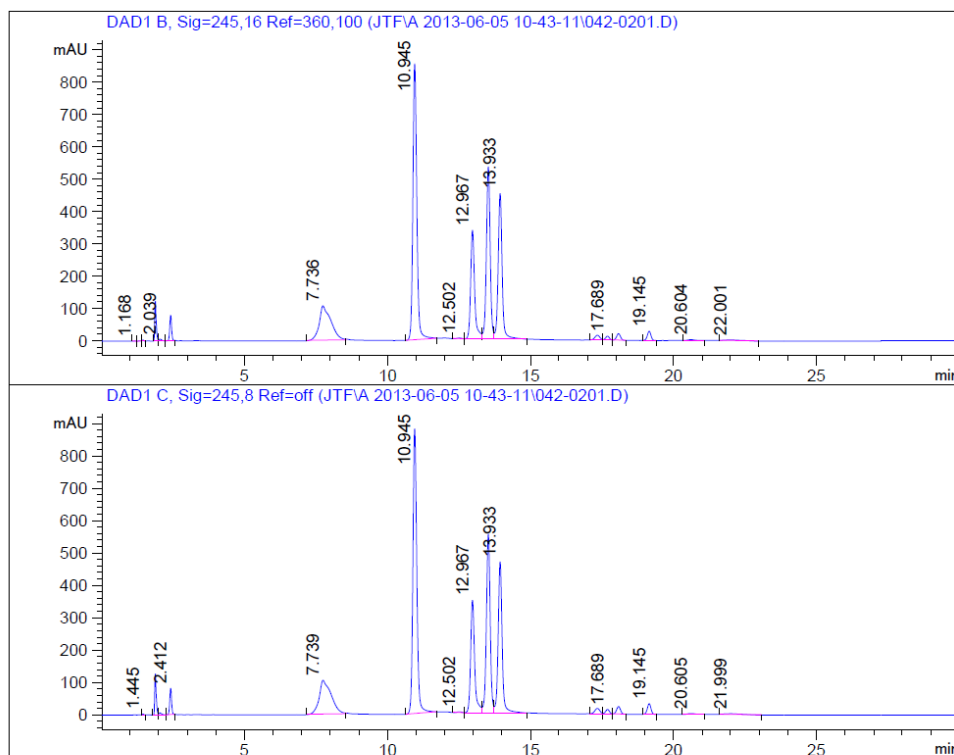

=====  
 Customized Report: Area Percent Report  
 =====

```

Multiplier      : 1.000000
Dilution        : 1.000000
Uncalibrated Peaks : not reported
    
```

Signal 1: DAD1 B, Sig=245,16 Ref=360,100

| Peak # | RT [min] | Type | Width [min] | Height [mAU] | Area % | Area [mAU*s] |
|--------|----------|------|-------------|--------------|--------|--------------|
| 1      | 1.168    | BV   | 0.091       | 1.007        | 0.023  | 5.915        |
| 2      | 1.324    | VV   | 0.121       | 1.359        | 0.038  | 9.656        |
| 3      | 1.445    | VB   | 0.052       | 3.670        | 0.049  | 12.523       |
| 4      | 1.876    | BV   | 0.054       | 123.814      | 1.748  | 447.414      |
| 5      | 2.039    | VV   | 0.100       | 5.760        | 0.151  | 38.756       |

## Figure S4. Cont.

Data file : D:\DATA\JTF\A 2013-06-05 10-43-11\042-0201.D

Sample Name: 2-2

2

```

=====
|Peak |   RT   |   Type | Width | Height | Area % | Area  |
| #    | [min]  |        | [min] | [mAU]  | %      | [mAU*s] |
|-----|-----|-----|-----|-----|-----|-----|
| 6    | 2.412  | VB     | 0.072 | 79.832 | 1.441  | 368.717 |
| 7    | 7.736  | BB     | 0.372 | 107.071| 11.911 | 3048.418 |
| 8    | 10.945 | BB     | 0.145 | 853.646| 31.735 | 8121.967 |
| 9    | 12.502 | BV     | 0.178 | 2.347  | 0.096  | 24.529  |
| 10   | 12.967 | VV     | 0.147 | 336.161| 12.759 | 3265.373 |
| 11   | 13.520 | VV     | 0.142 | 533.083| 19.285 | 4935.545 |
| 12   | 13.933 | VB     | 0.148 | 450.831| 17.165 | 4393.049 |
| 13   | 17.334 | BV     | 0.198 | 14.933 | 0.742  | 189.782 |
| 14   | 17.689 | VV     | 0.149 | 12.426 | 0.470  | 120.365 |
| 15   | 18.073 | VB     | 0.152 | 20.601 | 0.785  | 200.893 |
| 16   | 19.145 | BB     | 0.139 | 28.793 | 1.010  | 258.557 |
| 17   | 20.604 | BB     | 0.288 | 2.431  | 0.178  | 45.489  |
| 18   | 22.001 | BB     | 0.585 | 2.428  | 0.415  | 106.263 |
-----

```

Signal 2: DAD1 C, Sig=245,8 Ref=off

```

|Peak |   RT   |   Type | Width | Height | Area % | Area  |
| #    | [min]  |        | [min] | [mAU]  | %      | [mAU*s] |
|-----|-----|-----|-----|-----|-----|-----|
| 1    | 1.445  | VB     | 0.053 | 2.854  | 0.038  | 10.023  |
| 2    | 1.876  | BV     | 0.054 | 127.741| 1.740  | 460.700 |
| 3    | 2.039  | VB     | 0.099 | 5.739  | 0.142  | 37.649  |
| 4    | 2.412  | BB     | 0.071 | 82.432 | 1.427  | 377.799 |
| 5    | 7.739  | BB     | 0.381 | 105.302| 11.634 | 3080.844 |
| 6    | 10.945 | BB     | 0.145 | 881.365| 31.675 | 8388.284 |
| 7    | 12.502 | BV     | 0.178 | 2.442  | 0.096  | 25.537  |
| 8    | 12.967 | VV     | 0.147 | 348.442| 12.782 | 3384.880 |
| 9    | 13.520 | VV     | 0.142 | 552.816| 19.327 | 5118.388 |
| 10   | 13.933 | VB     | 0.148 | 467.379| 17.192 | 4552.745 |
| 11   | 17.334 | BV     | 0.198 | 17.191 | 0.826  | 218.670 |
| 12   | 17.689 | VV     | 0.149 | 14.314 | 0.525  | 138.917 |
| 13   | 18.073 | VB     | 0.152 | 23.710 | 0.874  | 231.424 |
| 14   | 19.145 | BB     | 0.139 | 33.072 | 1.122  | 297.064 |
| 15   | 20.605 | BB     | 0.289 | 2.556  | 0.181  | 48.030  |
| 16   | 21.999 | BB     | 0.581 | 2.549  | 0.421  | 111.551 |
-----

```

**Figure S5.** The HPLC Chromatography of the derivative of L-Rhamnose.

```

Data file : D:\DATA\JTF\A 2013-06-04 16-25-07\035-0501.D
Sample Name: 2-R
=====
Injection Date : Tue, 4. Jun. 2013          Seq Line : 5
Sample Name : 2-R                          Location : Vial 35
Acq Operator : SLL                         Inj. No. : 1
                                           Inj. Vol. : 20 µl

Acq. Method : D:\DATA\JTF\A 2013-06-04 16-25-07\JTF.M
Analysis Method : C:\CHEM32\1\METHODS\DEF_LC.M
Last Changed : Wed, 26. Jun. 2013, 10:02:45 am
                (modified after loading)
    
```

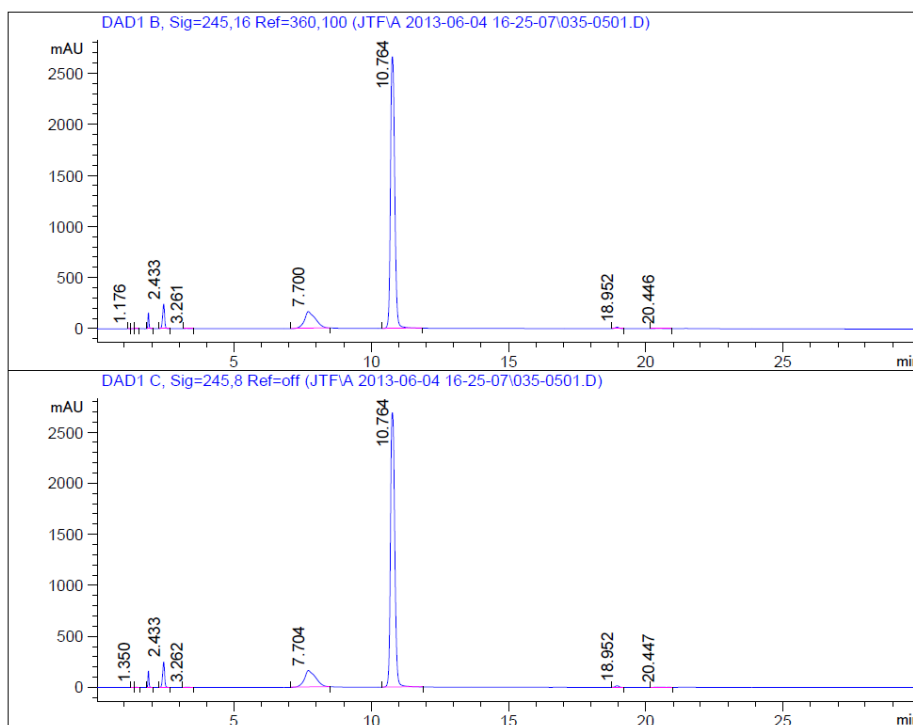

=====  
 Customized Report: Area Percent Report  
 =====

```

Multiplier      : 1.000000
Dilution        : 1.000000
Uncalibrated Peaks : not reported
    
```

Signal 1: DAD1 B, Sig=245,16 Ref=360,100

| Peak # | RT [min] | Type | Width [min] | Height [mAU] | Area % | Area [mAU*s] |
|--------|----------|------|-------------|--------------|--------|--------------|
| 1      | 1.176    | BV   | 0.070       | 1.195        | 0.015  | 5.326        |
| 2      | 1.350    | VV   | 0.125       | 1.718        | 0.036  | 12.737       |
| 3      | 1.434    | VB   | 0.055       | 5.449        | 0.058  | 20.209       |
| 4      | 1.876    | BB   | 0.044       | 154.442      | 1.198  | 418.829      |
| 5      | 2.433    | BB   | 0.077       | 241.809      | 3.498  | 1222.512     |

Figure S5. Cont.

Data file : D:\DATA\JTF\A 2013-06-04 16-25-07\035-0501.D  
 Sample Name: 2-R 2

---

| Peak # | RT [min] | Type | Width [min] | Height [mAU] | Area % | Area [mAU*s] |
|--------|----------|------|-------------|--------------|--------|--------------|
| 6      | 3.261    | BB   | 0.131       | 1.627        | 0.043  | 15.170       |
| 7      | 7.700    | BB   | 0.376       | 165.692      | 13.422 | 4691.088     |
| 8      | 10.764   | BB   | 0.166       | 2662.881     | 81.242 | 28394.283    |
| 9      | 18.952   | BB   | 0.141       | 14.090       | 0.371  | 129.772      |
| 10     | 20.446   | BB   | 0.295       | 2.171        | 0.116  | 40.398       |

---

Signal 2: DAD1 C, Sig=245,8 Ref=off

| Peak # | RT [min] | Type | Width [min] | Height [mAU] | Area % | Area [mAU*s] |
|--------|----------|------|-------------|--------------|--------|--------------|
| 1      | 1.350    | VV   | 0.104       | 1.204        | 0.024  | 8.706        |
| 2      | 1.433    | VB   | 0.056       | 4.256        | 0.045  | 16.143       |
| 3      | 1.876    | BB   | 0.044       | 160.668      | 1.218  | 435.131      |
| 4      | 2.433    | BB   | 0.077       | 250.172      | 3.540  | 1264.697     |
| 5      | 3.262    | BB   | 0.135       | 1.726        | 0.047  | 16.728       |
| 6      | 7.704    | BB   | 0.384       | 163.681      | 13.276 | 4742.915     |
| 7      | 10.764   | BB   | 0.170       | 2690.479     | 81.312 | 29048.945    |
| 8      | 18.952   | BB   | 0.141       | 16.177       | 0.417  | 148.868      |
| 9      | 20.447   | BB   | 0.299       | 2.291        | 0.120  | 42.999       |

---

**Figure S6.** The HPLC Chromatography of the derivative of D-Glucose.

Data file : D:\DATA\JTF\A 2013-06-04 16-25-07\033-0301.D

Sample Name: 2-G 1

```

=====
Injection Date : Tue, 4. Jun. 2013           Seq Line   :           3
Sample Name    : 2-G                         Location    :       Vial 33
Acq Operator   : SLL                         Inj. No.   :           1
                                                    Inj. Vol.  :       20 µl
=====
    
```

```

Acq. Method    : D:\DATA\JTF\A 2013-06-04 16-25-07\JTF.M
Analysis Method: C:\CHEM32\1\METHODS\DEF_LC.M
Last Changed   : Wed, 26. Jun. 2013, 10:02:45 am
                  (modified after loading)
    
```

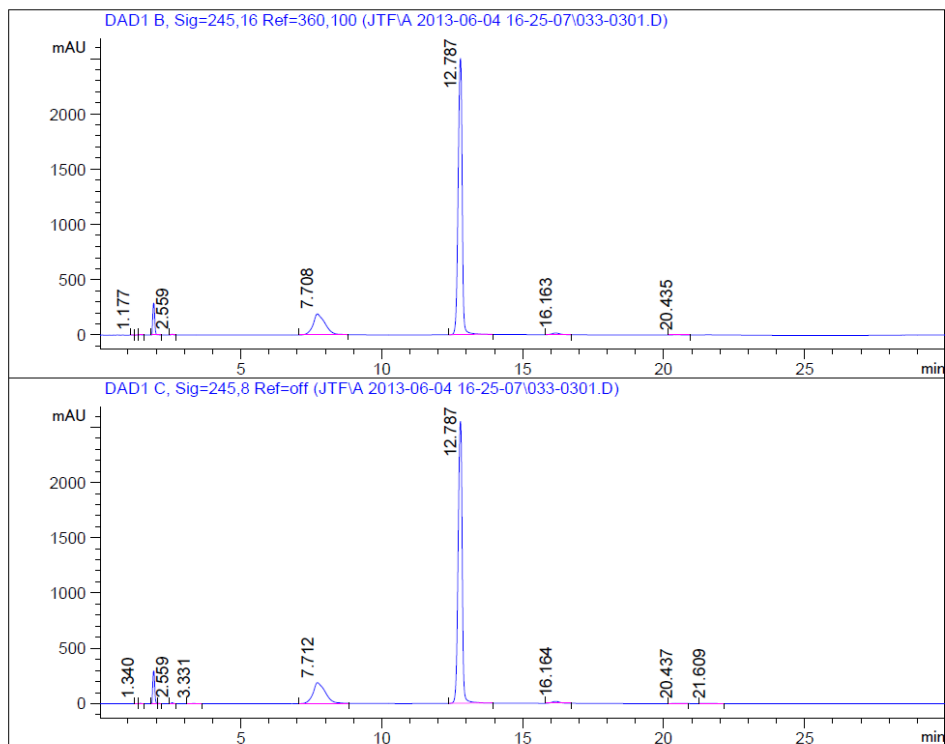

=====  
 Customized Report: Area Percent Report  
 =====

```

Multiplier      : 1.000000
Dilution        : 1.000000
Uncalibrated Peaks : not reported
    
```

Signal 1: DAD1 B, Sig=245,16 Ref=360,100

| Peak # | RT [min] | Type | Width [min] | Height [mAU] | Area % | Area [mAU*s] |
|--------|----------|------|-------------|--------------|--------|--------------|
| 1      | 1.177    | BV   | 0.074       | 1.248        | 0.019  | 6.008        |
| 2      | 1.324    | VV   | 0.109       | 1.732        | 0.038  | 12.357       |
| 3      | 1.433    | VB   | 0.055       | 5.841        | 0.066  | 21.424       |
| 4      | 1.904    | BB   | 0.081       | 288.180      | 4.335  | 1397.411     |
| 5      | 2.559    | BB   | 0.070       | 8.068        | 0.112  | 36.085       |

Figure S6. Cont.

Data file : D:\DATA\JTF\A 2013-06-04 16-25-07\033-0301.D

Sample Name: 2-G

2

| Peak # | RT [min] | Type | Width [min] | Height [mAU] | Area % | Area [mAU*s] |
|--------|----------|------|-------------|--------------|--------|--------------|
| 6      | 7.708    | BB   | 0.392       | 190.515      | 17.425 | 5616.439     |
| 7      | 12.787   | BB   | 0.156       | 2500.485     | 76.946 | 24801.738    |
| 8      | 16.163   | BB   | 0.306       | 15.031       | 0.920  | 296.519      |
| 9      | 20.435   | BB   | 0.306       | 2.268        | 0.139  | 44.764       |

Signal 2: DAD1 C, Sig=245,8 Ref=off

| Peak # | RT [min] | Type | Width [min] | Height [mAU] | Area % | Area [mAU*s] |
|--------|----------|------|-------------|--------------|--------|--------------|
| 1      | 1.340    | VV   | 0.108       | 1.220        | 0.028  | 9.154        |
| 2      | 1.432    | VB   | 0.060       | 4.788        | 0.059  | 19.605       |
| 3      | 1.904    | BV   | 0.080       | 296.711      | 4.322  | 1433.953     |
| 4      | 2.075    | VB   | 0.061       | 2.119        | 0.026  | 8.583        |
| 5      | 2.559    | BB   | 0.070       | 8.326        | 0.112  | 37.311       |
| 6      | 3.331    | BB   | 0.177       | 1.109        | 0.039  | 13.028       |
| 7      | 7.712    | BB   | 0.401       | 189.382      | 17.191 | 5703.253     |
| 8      | 12.787   | BB   | 0.159       | 2551.865     | 76.942 | 25526.463    |
| 9      | 16.164   | BB   | 0.306       | 17.410       | 1.041  | 345.519      |
| 10     | 20.437   | BB   | 0.260       | 2.348        | 0.131  | 43.430       |
| 11     | 21.609   | BB   | 0.338       | 1.448        | 0.108  | 35.778       |

**Figure S7.** The HPLC Chromatography of the derivative of D-Fructose.

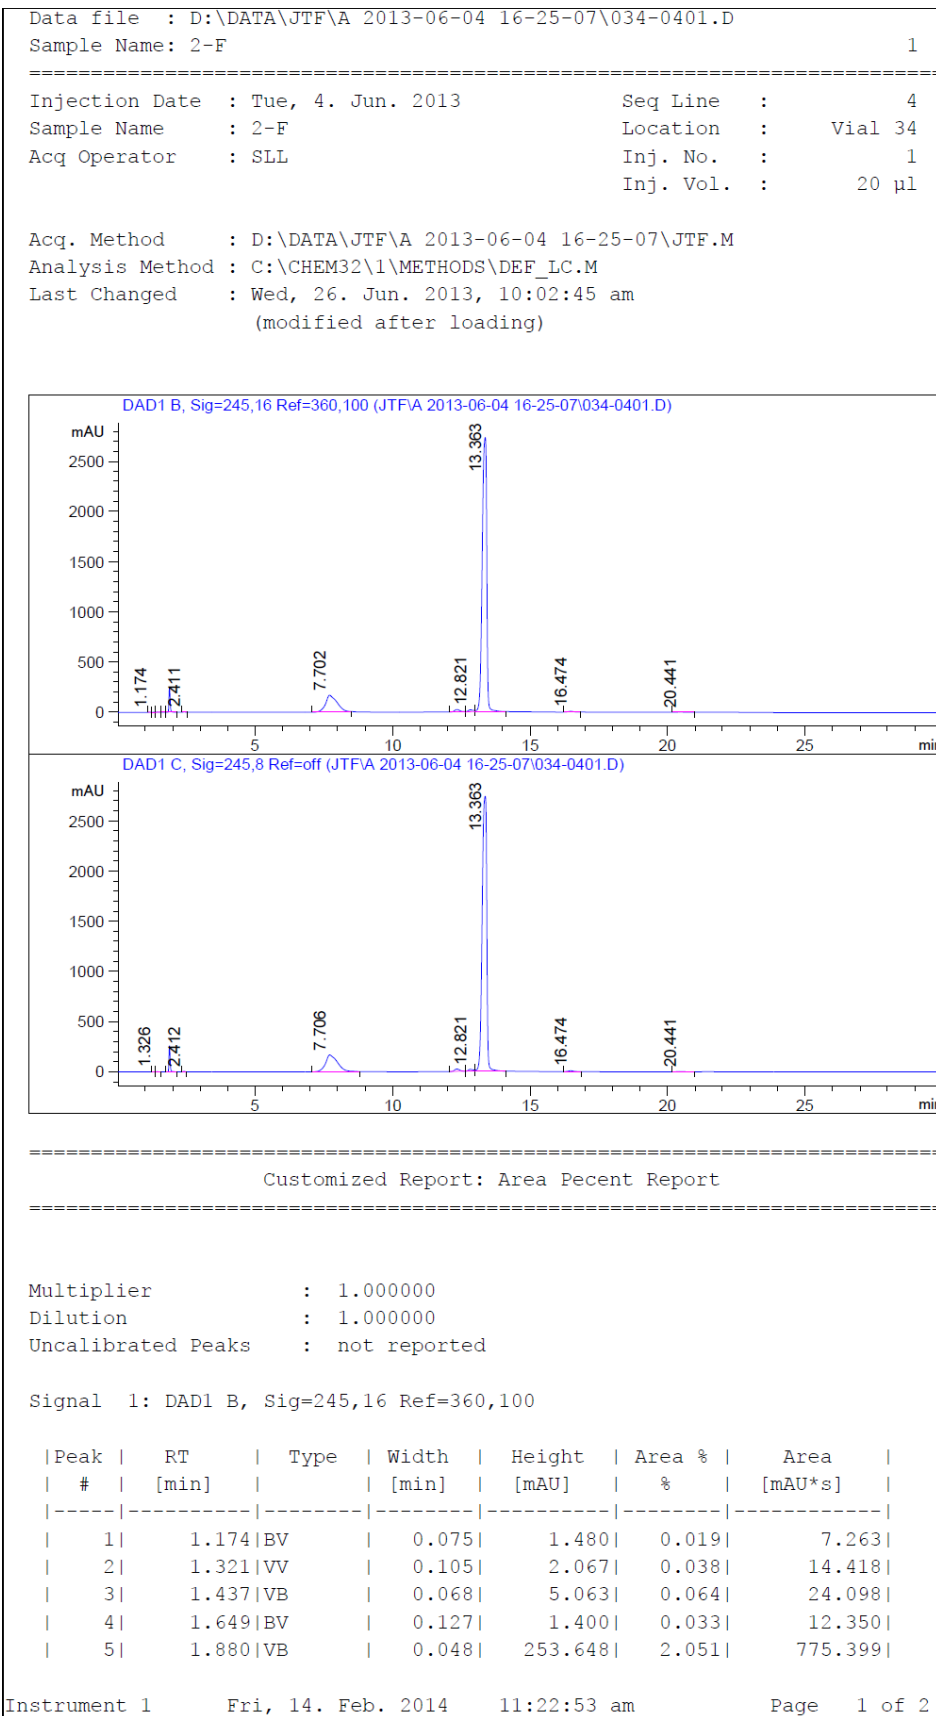

Figure S7. Cont.

Data file : D:\DATA\JTF\A 2013-06-04 16-25-07\034-0401.D

Sample Name: 2-F

2

| Peak # | RT [min] | Type | Width [min] | Height [mAU] | Area % | Area [mAU*s] |
|--------|----------|------|-------------|--------------|--------|--------------|
| 6      | 2.411    | BB   | 0.067       | 5.047        | 0.059  | 22.213       |
| 7      | 7.702    | BB   | 0.389       | 168.612      | 13.038 | 4928.301     |
| 8      | 12.334   | BV   | 0.223       | 24.305       | 0.922  | 348.687      |
| 9      | 12.821   | VV   | 0.194       | 20.983       | 0.772  | 291.965      |
| 10     | 13.363   | VB   | 0.183       | 2734.718     | 82.597 | 31221.105    |
| 11     | 16.474   | BB   | 0.218       | 7.717        | 0.301  | 113.628      |
| 12     | 20.441   | BB   | 0.296       | 2.159        | 0.106  | 39.998       |

Signal 2: DAD1 C, Sig=245,8 Ref=off

| Peak # | RT [min] | Type | Width [min] | Height [mAU] | Area % | Area [mAU*s] |
|--------|----------|------|-------------|--------------|--------|--------------|
| 1      | 1.326    | VV   | 0.105       | 1.267        | 0.023  | 8.993        |
| 2      | 1.437    | VB   | 0.067       | 3.597        | 0.044  | 16.957       |
| 3      | 1.880    | VB   | 0.047       | 262.097      | 2.044  | 789.036      |
| 4      | 2.412    | BB   | 0.063       | 4.973        | 0.052  | 20.004       |
| 5      | 7.706    | BB   | 0.402       | 167.927      | 13.180 | 5088.791     |
| 6      | 12.334   | BV   | 0.223       | 25.181       | 0.934  | 360.697      |
| 7      | 12.821   | VV   | 0.194       | 21.671       | 0.779  | 300.808      |
| 8      | 13.363   | VB   | 0.187       | 2742.731     | 82.498 | 31853.342    |
| 9      | 16.474   | BB   | 0.219       | 8.890        | 0.337  | 130.097      |
| 10     | 20.441   | BB   | 0.296       | 2.281        | 0.109  | 42.274       |



**Figure S8.** The HPLC Chromatography of the derivative of D-Xylose.

```

Data file   : D:\DATA\JTF\A 2013-06-04 16-25-07\036-0601.D
Sample Name : 2-X
=====
Injection Date : Tue, 4. Jun. 2013           Seq Line   :           6
Sample Name    : 2-X                         Location    :          Vial 36
Acq Operator   : SLL                         Inj. No.   :           1
                                           Inj. Vol.  :          20 µl

Acq. Method    : D:\DATA\JTF\A 2013-06-04 16-25-07\JTF.M
Analysis Method : C:\CHEM32\1\METHODS\DEF_LC.M
Last Changed   : Wed, 26. Jun. 2013, 10:02:45 am
                  (modified after loading)
    
```

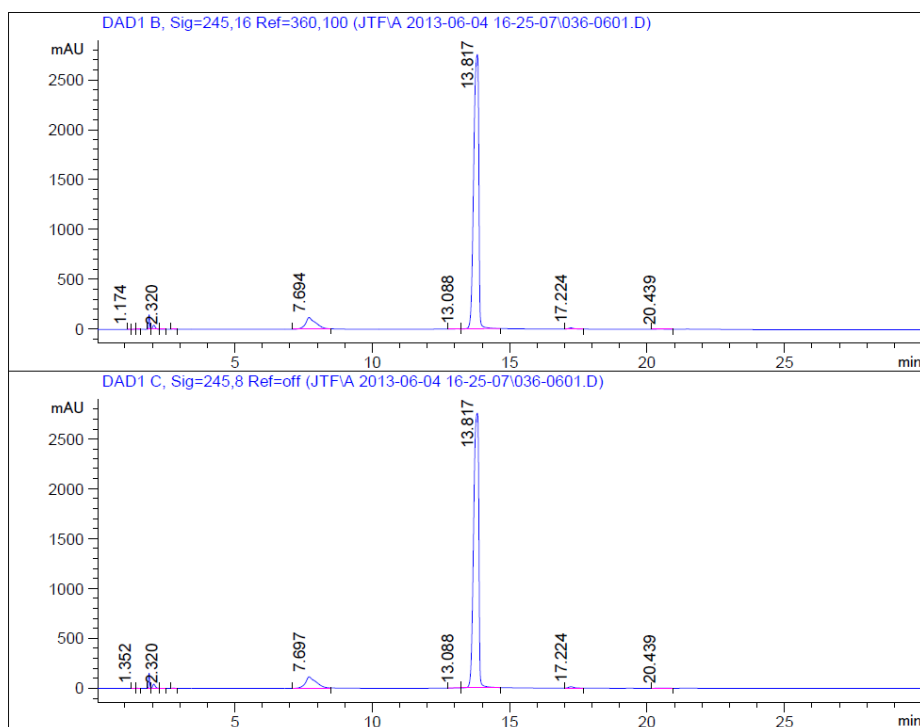

=====  
 Customized Report: Area Percent Report  
 =====

```

Multiplier      : 1.000000
Dilution        : 1.000000
Uncalibrated Peaks : not reported
    
```

Signal 1: DAD1 B, Sig=245,16 Ref=360,100

| Peak # | RT [min] | Type | Width [min] | Height [mAU] | Area % | Area [mAU*s] |
|--------|----------|------|-------------|--------------|--------|--------------|
| 1      | 1.174    | BV   | 0.075       | 1.172        | 0.014  | 5.560        |
| 2      | 1.352    | VV   | 0.123       | 1.629        | 0.030  | 11.868       |
| 3      | 1.434    | VB   | 0.056       | 5.276        | 0.050  | 19.765       |
| 4      | 1.874    | BV   | 0.044       | 148.290      | 1.026  | 401.687      |
| 5      | 2.042    | VV   | 0.102       | 41.796       | 0.718  | 280.888      |

Figure S8. Cont.

Data file : D:\DATA\JTF\A 2013-06-04 16-25-07\036-0601.D

Sample Name: 2-X

2

| Peak # | RT [min] | Type | Width [min] | Height [mAU] | Area % | Area [mAU*s] |
|--------|----------|------|-------------|--------------|--------|--------------|
| 6      | 2.320    | VB   | 0.095       | 1.248        | 0.022  | 8.482        |
| 7      | 2.751    | BB   | 0.083       | 2.871        | 0.040  | 15.614       |
| 8      | 7.694    | BB   | 0.349       | 117.653      | 7.858  | 3075.641     |
| 9      | 13.088   | BV   | 0.200       | 1.247        | 0.042  | 16.467       |
| 10     | 13.817   | VB   | 0.209       | 2749.947     | 89.662 | 35092.391    |
| 11     | 17.224   | BB   | 0.209       | 12.134       | 0.434  | 169.819      |
| 12     | 20.439   | BB   | 0.290       | 2.197        | 0.103  | 40.351       |

Signal 2: DAD1 C, Sig=245,8 Ref=off

| Peak # | RT [min] | Type | Width [min] | Height [mAU] | Area % | Area [mAU*s] |
|--------|----------|------|-------------|--------------|--------|--------------|
| 1      | 1.352    | VV   | 0.104       | 1.131        | 0.020  | 7.982        |
| 2      | 1.434    | VB   | 0.056       | 4.140        | 0.040  | 15.773       |
| 3      | 1.874    | BV   | 0.044       | 154.247      | 1.047  | 417.318      |
| 4      | 2.042    | VV   | 0.102       | 42.816       | 0.721  | 287.495      |
| 5      | 2.320    | VB   | 0.095       | 1.282        | 0.022  | 8.736        |
| 6      | 2.751    | BB   | 0.083       | 2.950        | 0.040  | 16.003       |
| 7      | 7.697    | BB   | 0.358       | 114.655      | 7.751  | 3089.331     |
| 8      | 13.088   | BV   | 0.197       | 1.252        | 0.041  | 16.230       |
| 9      | 13.817   | VB   | 0.212       | 2753.128     | 89.717 | 35760.539    |
| 10     | 17.224   | BB   | 0.210       | 14.041       | 0.496  | 197.565      |
| 11     | 20.439   | BB   | 0.291       | 2.312        | 0.106  | 42.217       |
